# Supplementary material for: Remarkable resistance to UVB of the marine bacterium Photobacterium angustum explained by an unexpected role of photolyase
Source: Royal Society of Chemistry journal article supplement (doi:10.1039/b902715g), 2009-06-05
Supplement: b902715g.pdf [file b902715g.pdf]

### Electronic Supplementary Information (ESI)

5

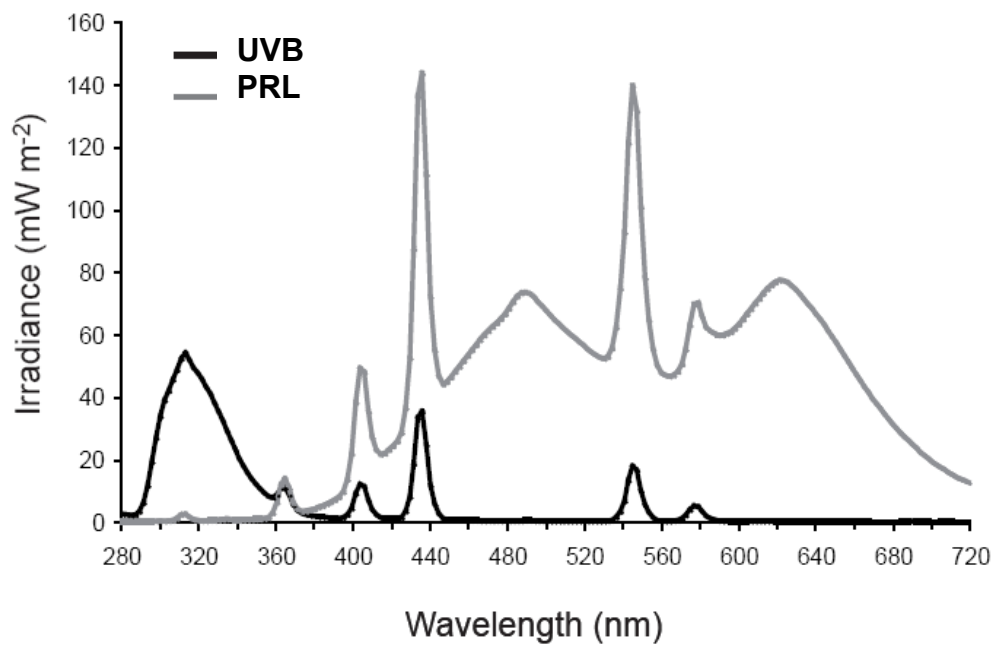

10

**Fig. S1** The emission spectra for the lamps used to induce DNA damage (UVB) and for photoreactivation after UVB exposure (PRL).

15

20

25

30

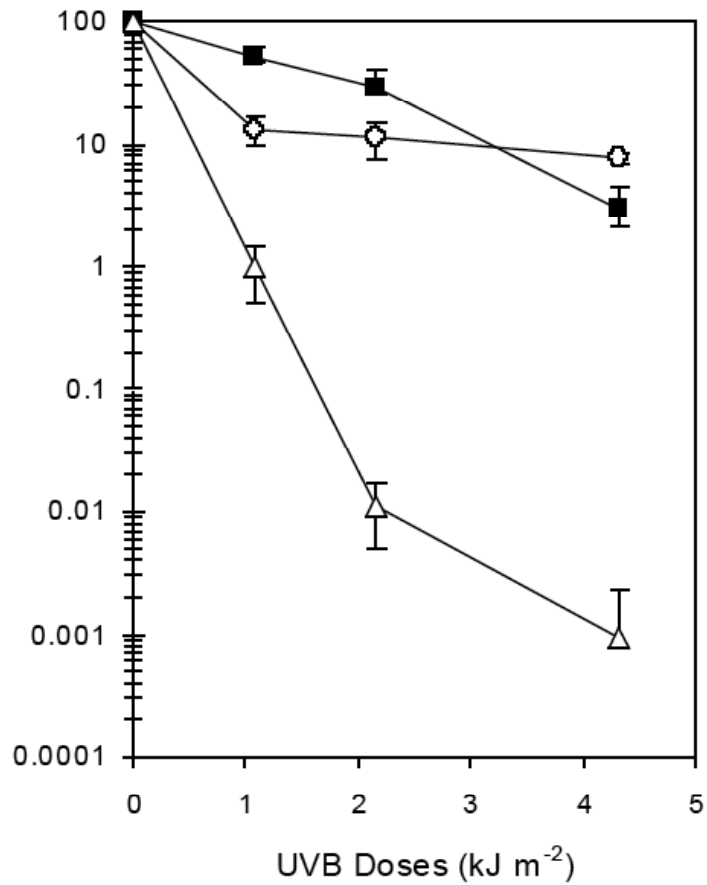

40

**Fig. S2** Effects of UVB radiation on the survival of bacteria. *V. natriegens* (Δ); *P. angustum* (○); *S. alaskensis* (■). The data are expressed as the mean (± standard deviations) of three independent experiments for *P. angustum* and *S. alaskensis* and two  
45 independent experiments for *V. natriegens*.
